# Supplementary material for: Identification of Salicylates in Willow Bark (Salix Cortex) for Targeting Peripheral Inflammation
Source: MDPI journal article supplement (doi:10.3390/ijms222011138), 2021-10-15
Supplement: s1 [file s1]

## *Supplementary Material*

### **Identification of salicylates in willow bark (*Salix cortex*) for targeting peripheral inflammation**

Kyriaki Antoniadou<sup>1,†</sup>, Corinna Herz<sup>2,†</sup>, Nguyen Phan Khoi Le<sup>2</sup>, Verena Karolin Mittermeier-Kleßinger<sup>1</sup>, Nadja Förster<sup>3</sup>, Matthias Zander<sup>3</sup>, Christian Ulrichs<sup>3</sup>, Inga Mewis<sup>3</sup>, Thomas Hofmann<sup>1</sup>, Corinna Dawid<sup>1,\*</sup>, Evelyn Lamy<sup>2,\*</sup>

<sup>1</sup> Chair of Food Chemistry and Molecular Sensory Science, Technical University of Munich, 85354 Freising, Germany; kyriaki.antoniadou@tum.de (K.A.); verena.mittermeier@tum.de (V.K.M.-K.); thomas.hofmann@tum.de (T.H.)

<sup>2</sup> Molecular Preventive Medicine, University Medical Center and Faculty of Medicine, University of Freiburg, 79108 Freiburg, Germany; corinna.herz@uniklinik-freiburg.de (C.H.); phan.khoi.nguyen.le@uniklinik-freiburg.de (N.P.K.L.);

<sup>3</sup> Urban Plant Ecophysiology, Humboldt University of Berlin, 14195 Berlin, Germany; nadja.foerster@hu-berlin.de (N.F.); matthias.zander@hu-berlin.de (M.Z.); christian.ulrichs@hu-berlin.de (C.U.); inga@entomology.de (I.M.)

\* Correspondence: corinna.dawid@tum.de (C.D.); evelyn.lamy@uniklinik-freiburg.de (E.L.); Tel.: +49-8161/71-2949 (C.D.); +49-761/270-82150 (E.L.)

<sup>†</sup> These authors contributed equally

\* To whom correspondence should be addressed

Evelyn Lamy, Prof. Dr.  
Phone: +49 761 / 270-82150  
Fax: +49 761 / 270-82030  
email: evelyn.lamy@uniklinik-freiburg.de

Corinna Dawid, Prof. Dr.  
Phone: +49 8161 / 71 2901  
Fax: +49 8161 / 71 2949  
email: corinna.dawid@tum.de

## Table of contents

|                                                                                   |    |
|-----------------------------------------------------------------------------------|----|
| 1. High-Performance Liquid Chromatography (HPLC) .....                            | 3  |
| 2. Isolation and identification of compounds 1-3 and 7 from SPE fraction F5 ..... | 3  |
| 3. Isolation and identification of compounds 4 and 5 from SPE fraction F6 .....   | 6  |
| 4. Isolation and identification of compound 6 from SPE fraction F7 .....          | 8  |
| 5. Isolation and identification of compound 7 from subfraction F5-2.....          | 9  |
| 6. QTRAP-LC-MS/MS conditions for sugar determination .....                        | 10 |
| 7. Absolute configuration of salicylates .....                                    | 11 |
| 8. Purification of fraction F7-4 .....                                            | 11 |
| 9. NMR spectroscopic data .....                                                   | 13 |

## 1. High-Performance Liquid Chromatography (HPLC)

For gradient and method development by means of analytical HPLC, the analytical 250 x 4.6 mm Luna® phenyl-hexyl column was used at room temperature. Therefore, SPE fractions F5, F6, and F7 were diluted in ACN/H<sub>2</sub>O (v/v 70/30) to 1 mg/mL and injected into the HPLC system using the autosampler. The detection was performed by ELSD (evaporative light-scattering detector) and DAD (diode-array detector). Since all compounds were visible by UV, no ELSD was further used. Following settings were applied: 200 nm wavelength, 30 µL injection volume, and 1 mL/min flow rate. For chromatographic separation 0.1% formic acid in water (solvent A) and 0.1% formic acid in acetonitrile (solvent B) were used starting with a mixture of 5% B for 5 min, then increasing eluent B to 100% within 55 min, held isocratic for another 5 min, decreased again to 5% B in 4 min, and finally held at 5% B for 6 min.

Preparative HPLC separation of the three SPE fractions was performed on a preparative 250 x 21.2 mm Luna® phenyl-hexyl column using UV-detection at 200 nm, flow rate of 20 mL/min, and the same solvents as mentioned above. SPE fractions F5 and F7 were diluted in pure methanol to a final concentration of 10 mg/mL, whereas the concentration of F6 was 5 mg/mL in methanol. Semi-preparative HPLC fractionation was performed on a semi-preparative 250 x 10 mm, 5 µm, Luna® pentafluorophenyl column (Phenomenex Ltd., Aschaffenburg, Deutschland) for fractions F5-5, F5-2 and F7-8, and on a semi-preparative 250 x 10 mm, 5 µm, Luna® phenyl-hexyl column (Phenomenex Ltd., Aschaffenburg, Germany) for fractions F6-12 and F6-13 using 0.1% formic acid in water (solvent A) and 0.1% formic acid in methanol (solvent B). Following conditions were applied for the isolation and purification (purity ≥ 95% by NMR) of the compounds 1-7 by means of preparative (flow rate of 20 mL/min) and semi-preparative (flow rate of 4.7 mL/min) HPLC:

## 2. Isolation and identification of compounds 1-3 and 7 from SPE fraction F5

For the purification of the compounds 1-3 and 7, SPE fraction F5 was separated by means of preparative UV-HPLC ( $\lambda = 200$  nm, injection volume: 500 µL, run time: 33 min). The chromatography started at 22% B, held for 3 min, increased in 10 min to 23.5% B, continued for 15 min at isocratic flow, and decreased to the initial conditions of 22% B, and finally held at 22% B for 3 min. Monitoring the UV signal at 200 nm, six fractions, F5-1 to F5-6, were collected, the solvent was removed, and used for further separation.

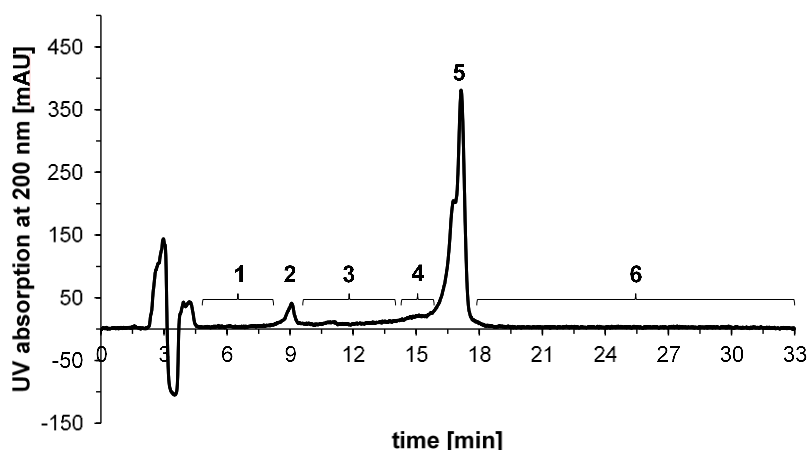

**Figure S1:** Preparative UV-HPLC chromatogram of SPE fraction F5 at 200 nm.

Further, fraction F5-5 (5 mg/mL in H<sub>2</sub>O) was purified by means of semi-preparative UV-HPLC ( $\lambda = 200$  nm, injection volume: 300 µL, run time: 65 min) and the following gradient: starting at 22% solvent B for 3 min, increased in 15 min to 27.7% B, held at 27.7% B for 2 min, increased to 52% B in 10 min, held at 52% B for 3 min, then increased further in 20 min to 57% B, held there for 2 min, and finally decreased in 3 min to 22% B, and held at 22% B for 2 min. 2'-O-acetylsalicortin (1), 3'-O-

acetylsalicortin (**2**) and 2'-*O*-acetylsalicin (**3**) were structurally elucidated in fractions F5-5-7 (**1**), F5-5-5 (**2**), and F5-5-3 (**3**) using LC-ToF-MS and 1D/2D-NMR experiments.

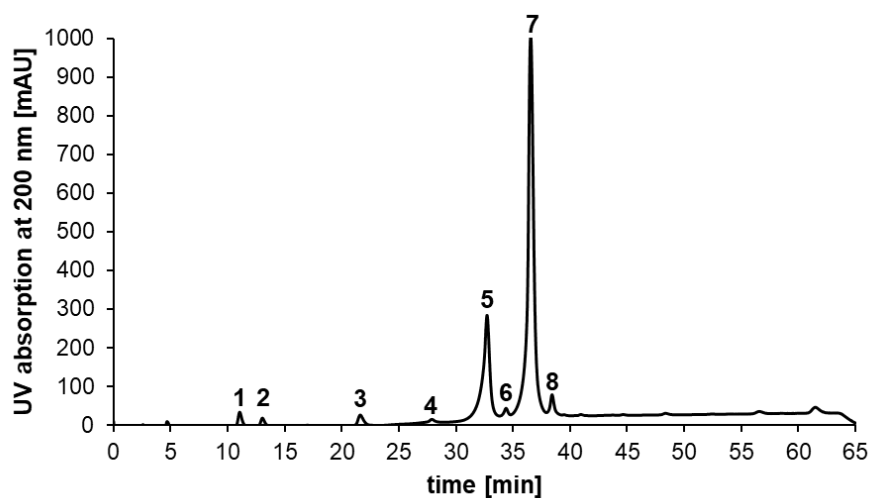

**Figure S2:** Semi-preparative UV-HPLC chromatogram of fraction F5-5 at 200 nm.

#### 2'-*O*-acetylsalicortin (**1**)

$C_{22}H_{26}O_{11}$ ; UV (MeOH/H<sub>2</sub>O, 1/1 v/v):  $\lambda_{\max}$ =204, 220, 272 nm; LC-TOF-MS (ESI):  $m/z$  511.1455 [M+HCO<sub>2</sub>H-H]<sup>-</sup>, 465.1434 [M-H]<sup>-</sup>; LC-MS/MS (DP = -160 V, CE = -80 V):  $m/z$  (%) 154.88 (100), 136.86 (78), 122.86 (57), 120.90 (22), 92.95 (22), 82.99 (19), 80.99 (10).

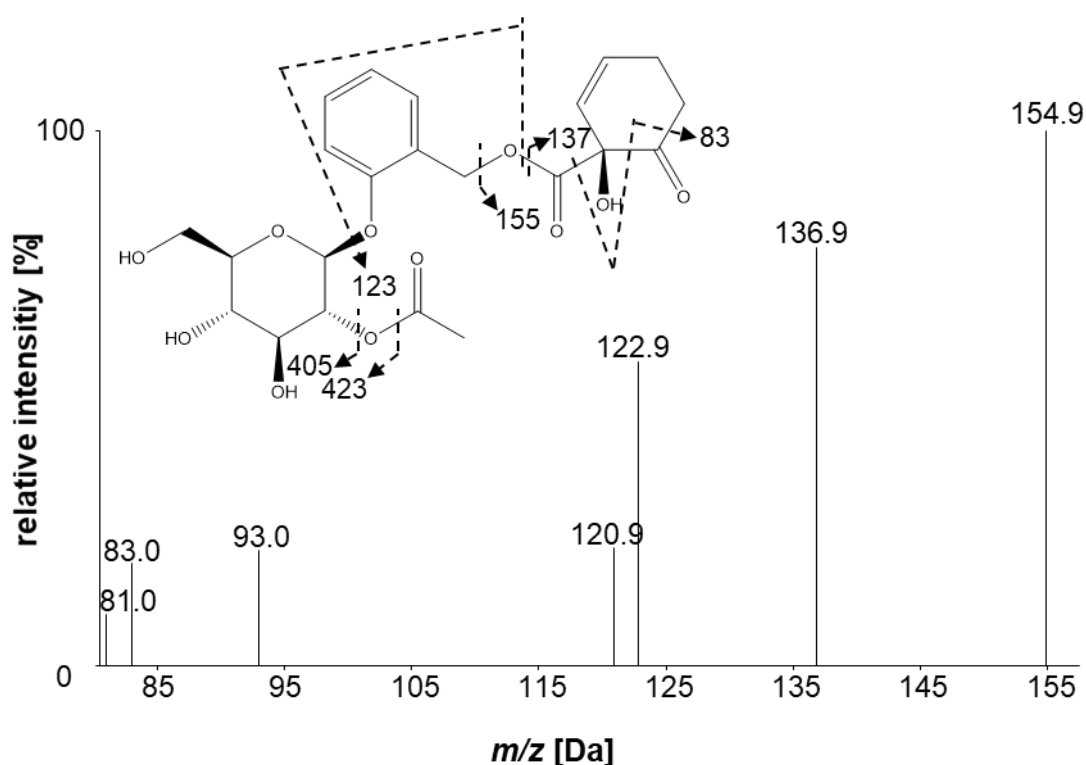

**Figure S3:** Centroided MS<sup>2</sup> spectrum of 464.9 Da showing the fragmentation pattern of 2'-*O*-acetylsalicortin (**1**).

### 3'-O-acetylsalicortin (2)

C<sub>22</sub>H<sub>26</sub>O<sub>11</sub>; UV (MeOH/H<sub>2</sub>O, 1/1 v/v):  $\lambda_{\text{max}}$ =200, 220, 272 nm; LC-TOF-MS (ESI):  $m/z$  511.1458 [M+HCO<sub>2</sub>H-H]<sup>-</sup>, 465.1421 [M-H]<sup>-</sup>; LC-MS/MS (DP = -80 V, CE = -66 V):  $m/z$  (%) 404.92 (41), 154.92 (100), 136.94 (76), 122.91 (61), 120.94 (19), 83.02 (19), 80.97 (5).

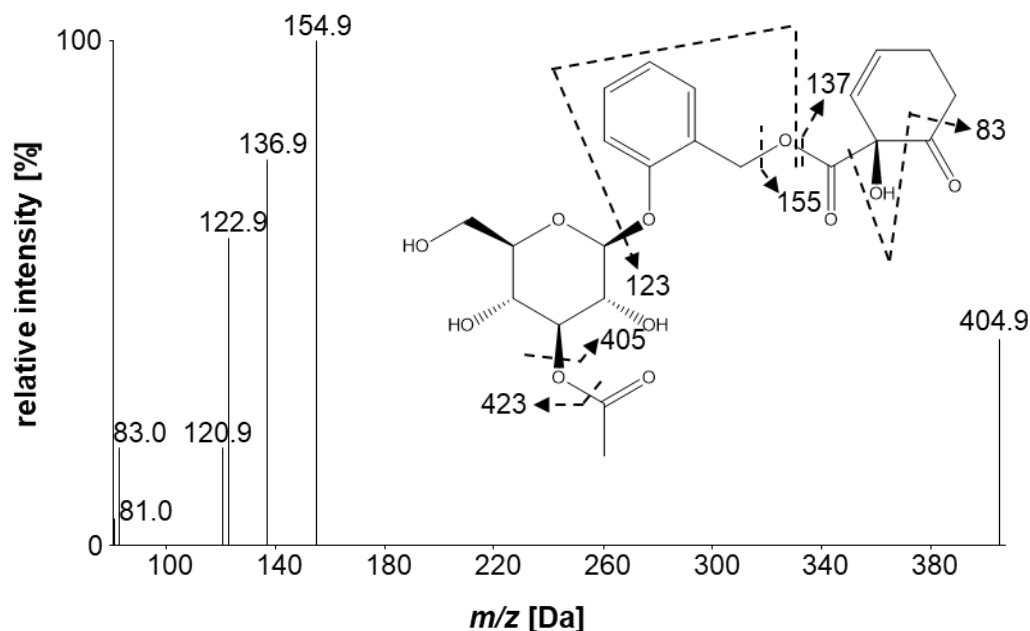

Figure S4: Centroided MS<sup>2</sup> spectrum of 465.0 Da showing the fragmentation pattern of 3'-O-acetylsalicortin (2).

### 2'-O-acetylsalicin (3)

C<sub>15</sub>H<sub>20</sub>O<sub>8</sub>; UV (H<sub>2</sub>O):  $\lambda_{\text{max}}$ = 204, 220, 268 nm; LC-TOF-MS (ESI):  $m/z$  373.1130 [M+HCO<sub>2</sub>H-H]<sup>-</sup>, 327.1070 [M-H]<sup>-</sup>; LC-MS/MS (DP = -5 V, CE = -76 V):  $m/z$  (%) 326.92 (100), 304.73 (73), 174.82 (32), 122.95 (87), 120.93 (8), 92.92 (3).

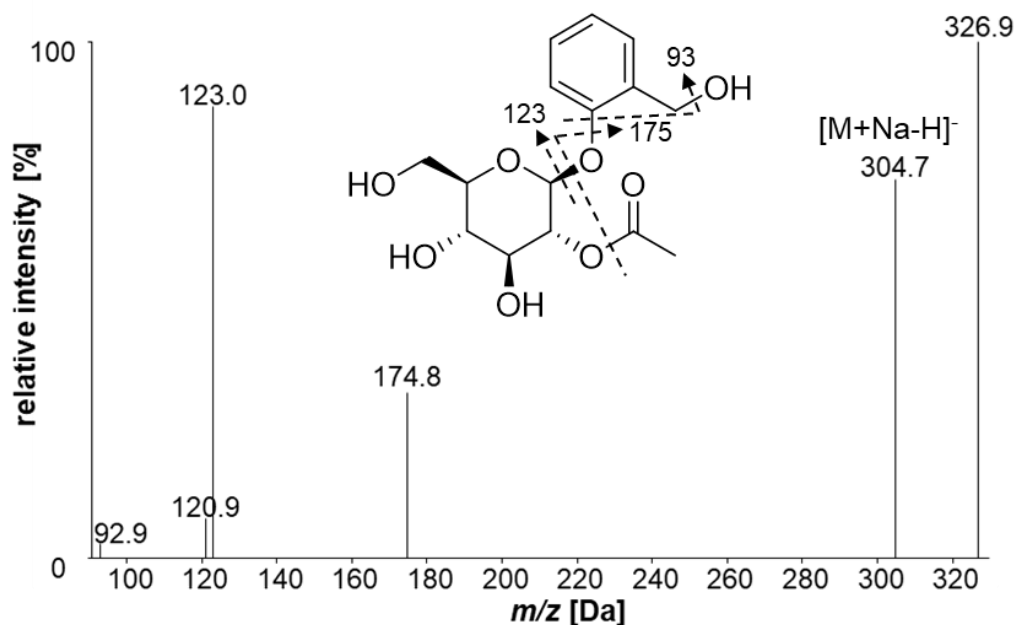

Figure S5: Centroided MS<sup>2</sup> spectrum of  $m/z$  373.0 [M+HCO<sub>2</sub>H-H]<sup>-</sup> showing the fragmentation pattern of 2'-O-acetylsalicin (3).

### 3. Isolation and identification of compounds 4 and 5 from SPE fraction F6

SPE Fraction F6 was purified by means of preparative UV-HPLC ( $\lambda = 200$  nm, injection volume: 600  $\mu$ L, run time: 35 min) and the following conditions: starting at 23% B, held isocratically for 3 min, increased in 21 min to 33% B, held at 33% B for 6 min, and decreased finally in 3 min to 23% B, which was held for 2 min. Fourteen fractions, F6-1 to F6-14, were collected, freed from the solvent, and used for further separation.

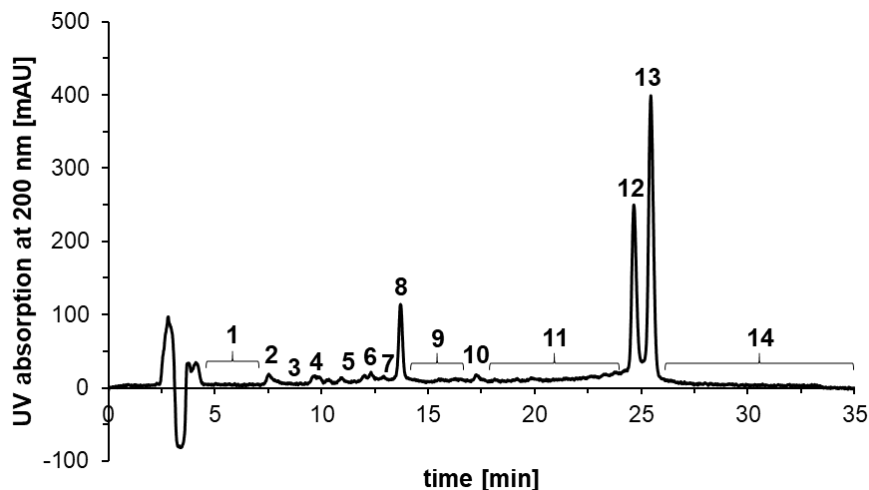

**Figure S6:** UV-HPLC chromatogram ( $\lambda = 200$  nm) of SPE fraction F6 prepared from the methanol extract of *S. pentandra*.

Fraction F6-12 (10 mg/mL in MeOH/H<sub>2</sub>O (v/v 1/1)) was purified by means of semi-preparative UV-HPLC ( $\lambda = 200$  nm, injection volume: 150  $\mu$ L, run time: 50 min): the chromatography started at 20% B, held there for 3 min, increased in 43.5 min to 32% B, decreased again in 1.5 min to 20% B and held at 20% B for 2 min. 2',6'-O-diacetylsalicortin (**4**) was structurally elucidated in fraction 6-12-2 using LC-ToF-MS and 1D/2D-NMR experiments.

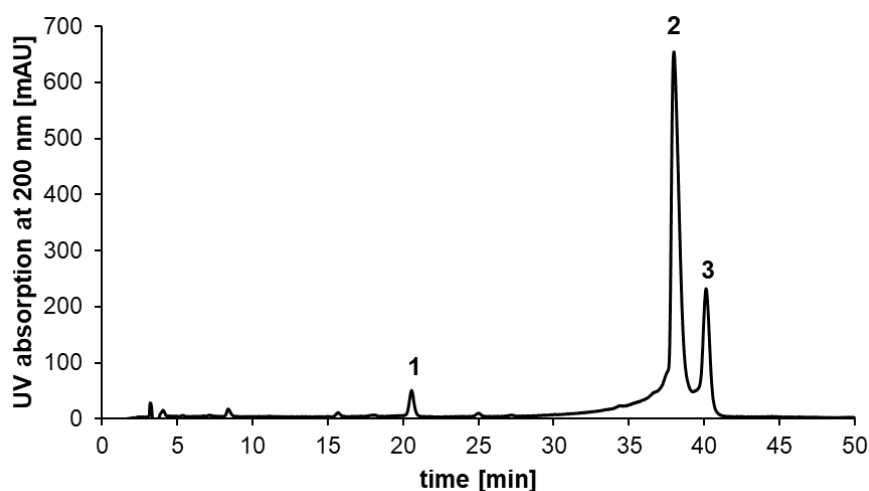

**Figure S7:** Semi-preparative UV-HPLC ( $\lambda = 200$  nm) chromatogram of fraction F6-12.

#### 2',6'-O-diacetylsalicortin (**4**)

C<sub>24</sub>H<sub>28</sub>O<sub>12</sub>; UV (MeOH/H<sub>2</sub>O, 1/1 v/v):  $\lambda_{\text{max}}$ =200, 272, 300 nm; LC-TOF-MS (ESI):  $m/z$  553.1569 [M+HCO<sub>2</sub>H-H]<sup>-</sup>, 507.1551 [M-H]<sup>-</sup>; LC-MS/MS (DP = -160 V, CE = -62 V):  $m/z$  (%) 155.00 (81), 136.90 (100), 122.89 (58), 120.91 (22), 92.94 (23), 82.94 (17), 80.98 (4).

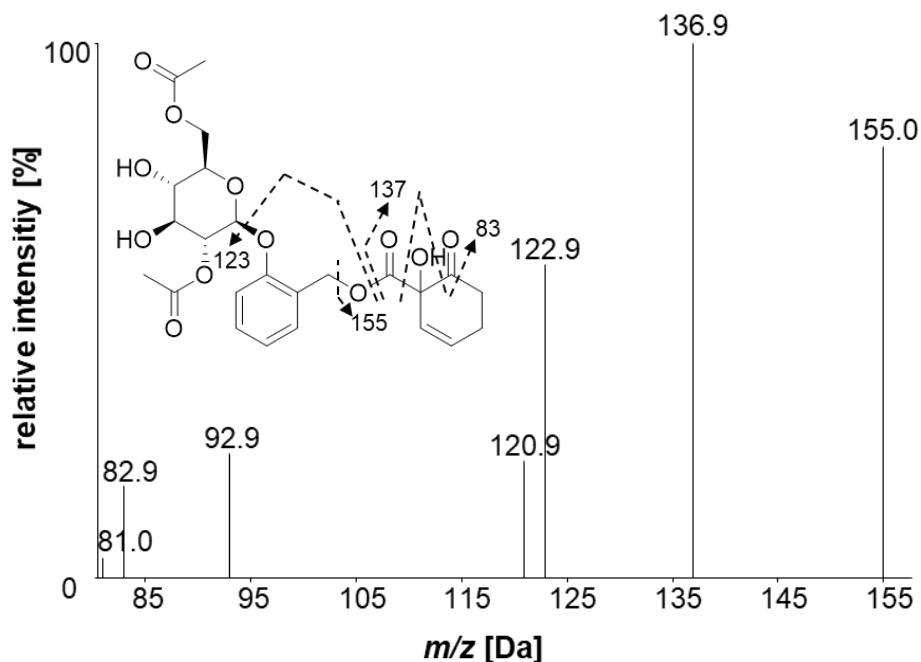

**Figure S8:** Centroided MS<sup>2</sup> spectrum of *m/z* 507.0 showing the fragmentation pattern of 2',6'-*O*-diacetylsalicortin (4).

Fraction F6-13 (10 mg/mL in MeOH/H<sub>2</sub>O (v/v 1/1)) was purified by means of semi-preparative UV-HPLC ( $\lambda = 200$  nm, injection volume: 200  $\mu$ L, run time: 34 min) and the following gradient: starting with an isocratic step at 27% B for 3 min, increased in 27 min to 32% B, finally decreased in 4 min to 27% B and held there. Lasiandrin (5) was structurally elucidated in fraction 6-13-2 using LC-ToF-MS and 1D/2D-NMR experiments.

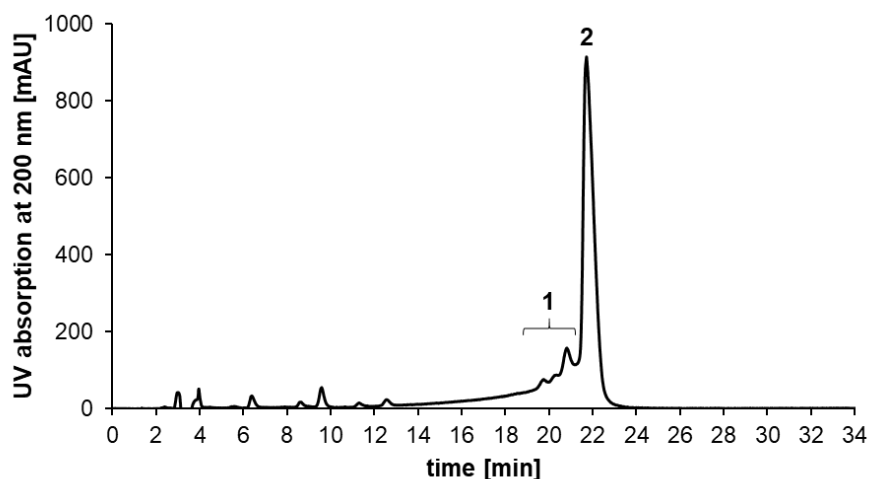

**Figure S9:** Semi-preparative UV-HPLC chromatogram of fraction F6-13 at 200 nm.

#### **lasiandrin (5)**

C<sub>29</sub>H<sub>32</sub>O<sub>14</sub>; UV (MeOH/H<sub>2</sub>O, 1/1 v/v):  $\lambda_{\text{max}}$ =200, 272, 300 nm; LC-TOF-MS (ESI<sup>-</sup>): *m/z* 649.1791 [M+HCO<sub>2</sub>H-H]<sup>-</sup>, 603.1762 [M-H]<sup>-</sup>; LC-MS/MS (DP = -135 V, CE = -84 V): *m/z* (%) 464.99 (100), 154.90 (85), 136.91 (83), 110.95 (32), 108.93 (15), 92.95 (30), 82.98 (26), 80.96 (10).

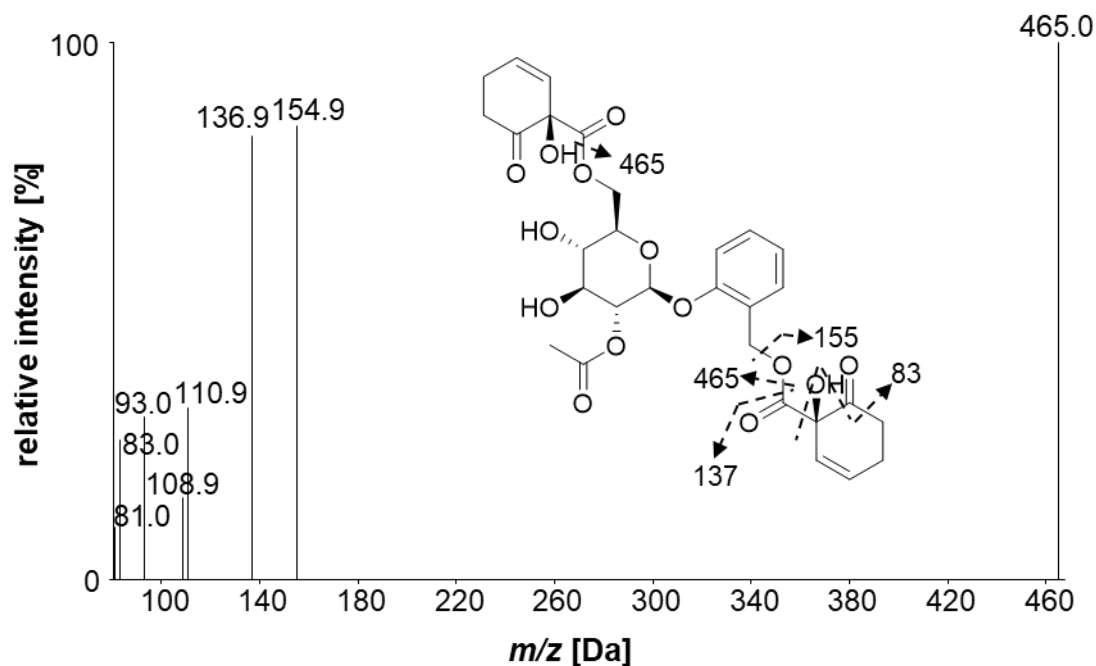

**Figure S10:** Centroided MS<sup>2</sup> spectrum of *m/z* 603.2 showing the fragmentation pattern of lasiandrin (5).

#### 4. Isolation and identification of compound 6 from SPE fraction F7

SPE fraction F7 was purified by means of preparative UV-HPLC ( $\lambda = 200$  nm, injection volume: 700  $\mu$ L, run time: 34 min): the chromatography started at 28% B, held there for 3 min, increased in 7 min to 32% B, isocratic for 2 min, increased in 14 min to 37% B, isocratic at 37% B for 2 min, decreased again in 3 min to 28% B, where it was held isocratic for 3 min. Fourteen fractions, F7-1 to F7-14, were collected, freed from the solvent, and used for further separation.

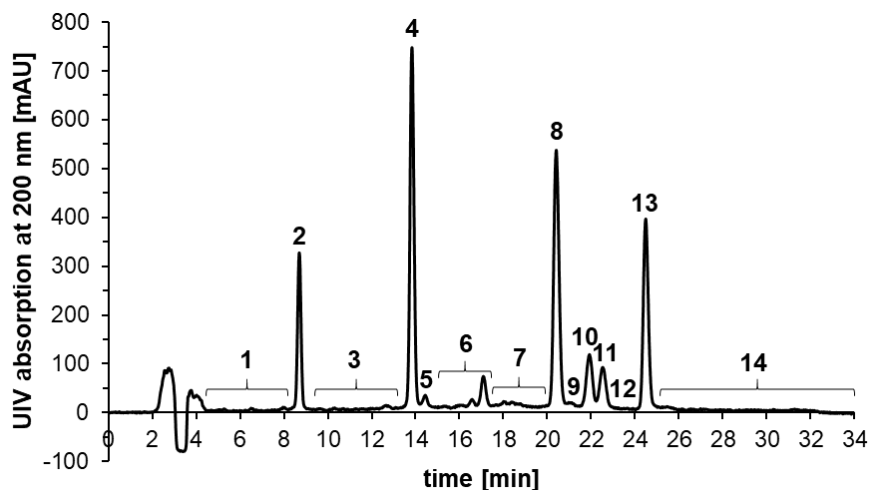

**Figure S11:** UV-HPLC chromatogram of SPE fraction F7 at 200 nm.

Fraction F7-8 was purified by means of semi-preparative UV-HPLC ( $\lambda = 200$  nm, injection volume: 200  $\mu$ L, run time: 42 min) and the following chromatographic conditions: starting at 26% B, held there isocratic for 3 min, increased in 23 min to 62% B, held at 62% B for 10 min, decreased in 4 min to 26 % B, where it was held isocratic for 2 min. Tremulacin (6) was structurally characterized in fraction 7-8-4 using LC-ToF-MS and 1D/2D-NMR experiments.



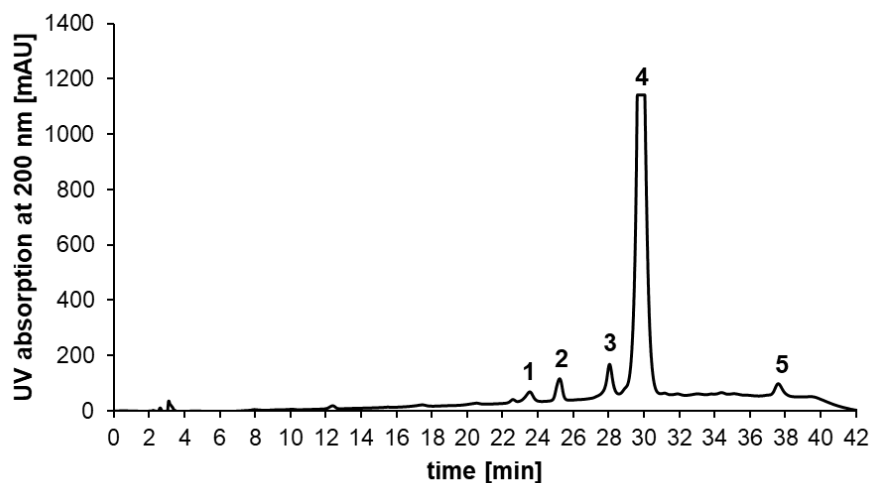

Figure S12: Semi-preparative UV-HPLC chromatogram of fraction F7-8 at 200 nm.

#### tremulacin (6)

$C_{27}H_{28}O_{11}$ ; UV (MeOH/H<sub>2</sub>O, 1/1 v/v):  $\lambda_{max}$ =204, 236, 272 nm; LC-TOF-MS (ESI):  $m/z$  573.1617 [M+HCO<sub>2</sub>H-H]<sup>-</sup>, 527.1586 [M-H]<sup>-</sup>; LC-MS/MS (DP = -20 V, CE = -86 V):  $m/z$  (%) 404.95 (100), 154.90 (49), 136.90 (39), 122.92 (14), 120.94 (67), 82.97 (10), 80.97 (10), 76.97 (22).

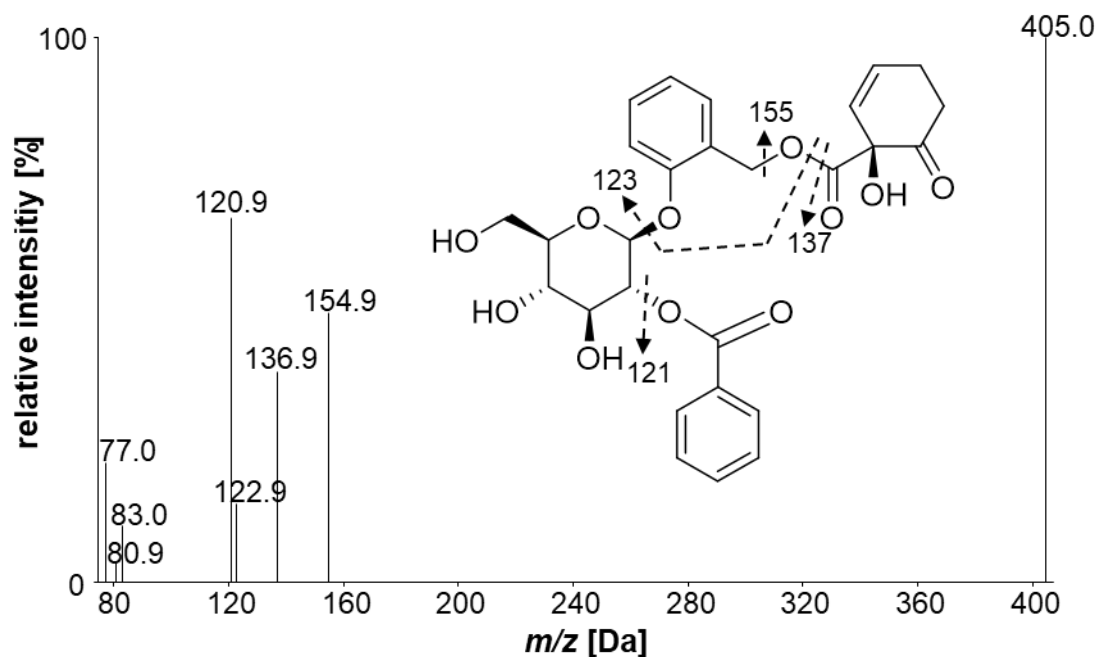

Figure S13: Centroided MS<sup>2</sup> spectrum of  $m/z$  527.0 showing the fragmentation pattern of tremulacin (6).

#### 5. Isolation and identification of compound 7 from subfraction F5-2

Fraction F5-2 (1 mg/mL in methanol/water (v/v 1/1)) was purified by means of semi-preparative UV-HPLC ( $\lambda$  = 252 nm, injection volume: 300  $\mu$ L, run time: 37 min) using the following chromatographic conditions: starting at 22% B, held there for 3 min, increased in 17 min to 45% B, held at 45% B for 2 min, increased further in 8 min to 50% B, held at 50% B for 3 min, decreased in 2 min to 22% B, and finally held isocratic for 2 min. Cinnamrutinose A was structurally elucidated in fraction 5-2-2 (7) using LC-ToF-MS and 1D/2D-NMR experiments.

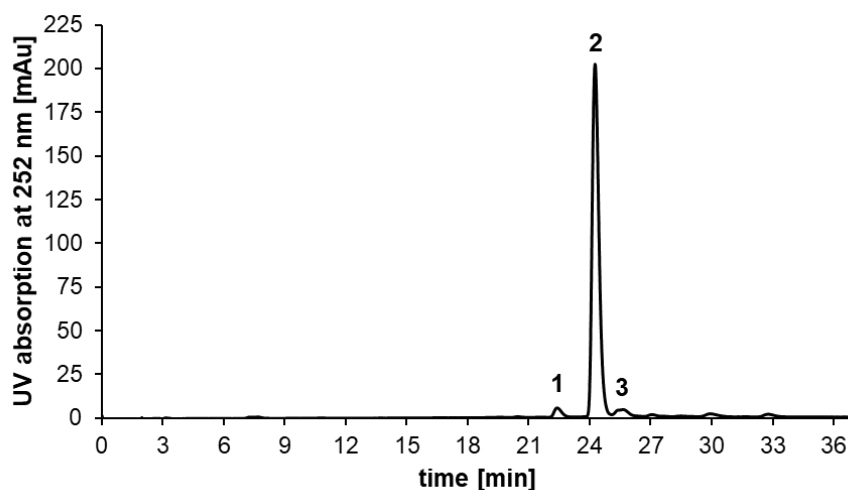

Figure S14: Semi-preparative UV-HPLC chromatogram of fraction F5-2 at 252 nm.

#### cinnamrutinose A (7)

$C_{21}H_{30}O_{10}$ ; UV (MeOH/H<sub>2</sub>O, 1/1 v/v):  $\lambda_{\max}$ =204, 252 nm; LC-TOF-MS (ESI<sup>-</sup>):  $m/z$  487.1824 [M+HCO<sub>2</sub>H-H]<sup>-</sup>, 441.1768 [M-H]<sup>-</sup>; LC-MS/MS (DP = -55 V, CE = -56 V):  $m/z$  (%) 306.92 (100), 162.92 (41), 160.89 (3), 126.91 (1), 124.91 (14), 118.90 (13), 102.92 (19), 100.87 (7), 58.97 (4).

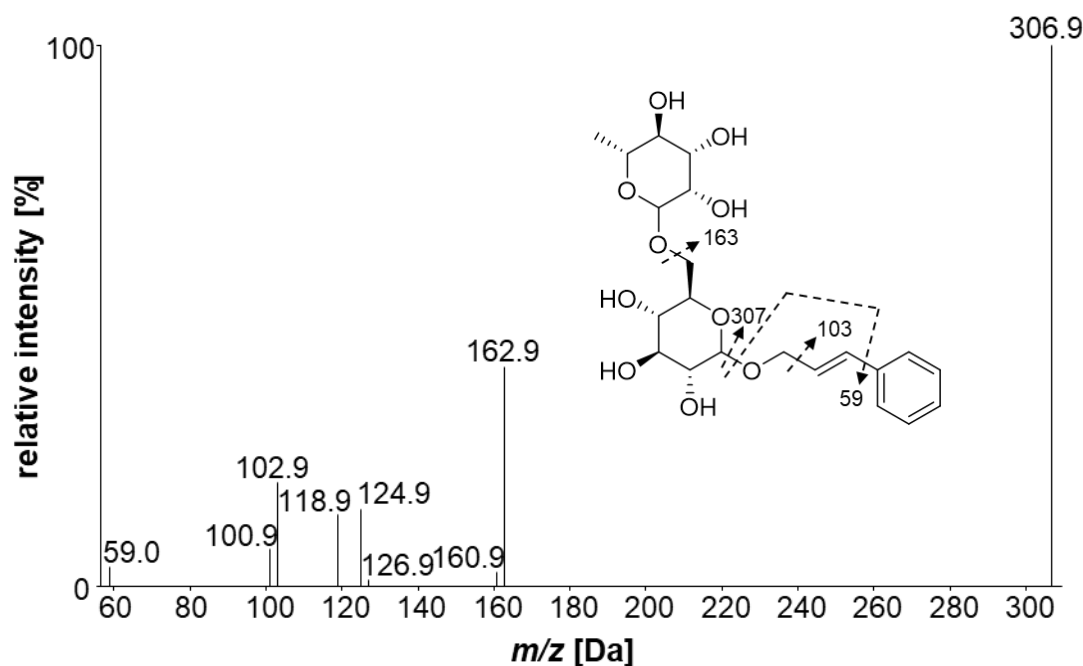

Figure S15: Centroided MS<sup>2</sup> spectrum of  $m/z$  441.1 showing the fragmentation pattern of cinnamrutinose A (7).

#### 6. QTRAP-LC-MS/MS conditions for sugar determination

For the determination of the sugar residues, the QTRAP-LC-MS/MS system was employed using 1% formic acid in H<sub>2</sub>O (solvent A) and 1% formic acid in acetonitrile (solvent B) and positive ionization mode (ESI<sup>+</sup>). For chromatography a 2.1x100 mm, 1.7  $\mu$ m, Kinetex F5 column (Phenomenex, Aschaffenburg, Germany) was used and the following gradient (adapted from Schmid et al. (2018)) was applied: starting conditions were 5% of solvent B, held isocratic for 1.99 min at 5% B, then, increased to 20% in 3 min, in 21 min to 25% and in 1 min to 100 % B, held isocratic for 3 min at 100% B and decreased to 5% B in 1 min and finally held isocratic for 4 min at 5% B.

The MRM transitions Q1/Q3 of the derivatized sugars *D*-glucose (*m/z* 461.0/298.1), *L*-glucose (*m/z* 461.0/298.1), *D*-galactose (*m/z* 461.1/298.2), *D*-galacturonic acid (*m/z* 475.0/312.1), *D*-glucuronic acid (*m/z* 475.0/312.1), and *L*-rhamnose (*m/z* 445.0/282.1), as well as the DP, CE, and CXP values were adopted from Schmid et al. (2018).

## 7. Absolute configuration of salicylates

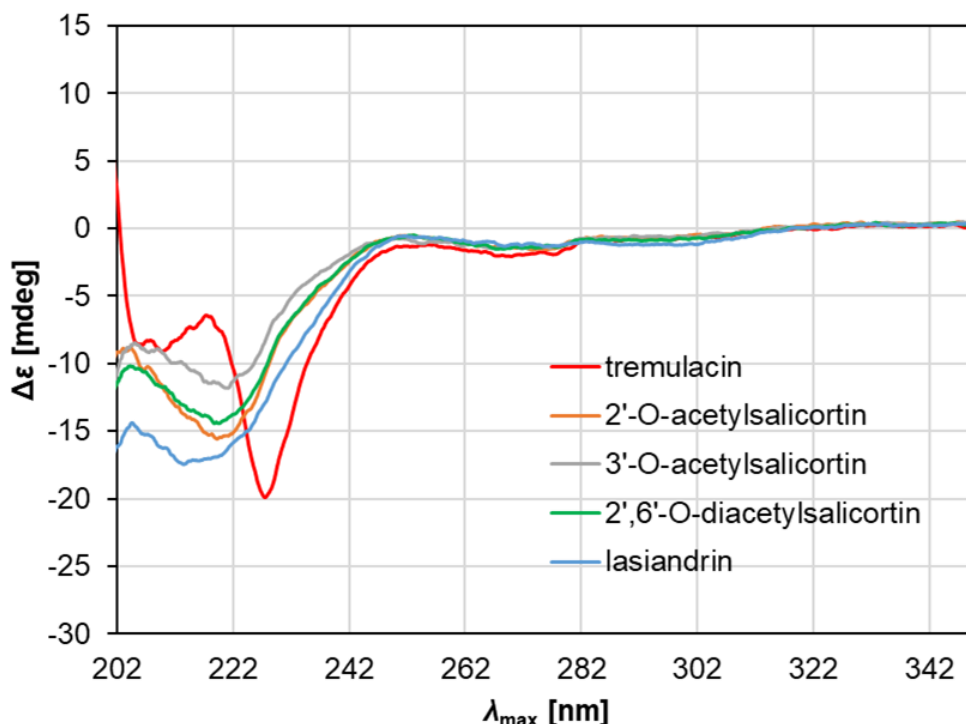

**Figure S16:** Absolute configuration of the isolated salicylates, 1-2 and 4-6, substituted with a HCH moiety determined by CD-spectroscopy. 2'-*O*-acetylsalicortin (1):  $\Delta\epsilon = -15.5$  mdeg (*c* 0.43 mM, CH<sub>3</sub>OH,  $\lambda_{\max} = 220$  nm), 3'-*O*-acetylsalicortin (2):  $\Delta\epsilon = -11.7$  mdeg (*c* 0.43 mM, CH<sub>3</sub>OH,  $\lambda_{\max} = 221$  nm), 2',6'-*O*-diacetylsalicortin (4):  $\Delta\epsilon = -14.4$  mdeg (*c* 0.39 mM, CH<sub>3</sub>OH,  $\lambda_{\max} = 220$  nm), lasiandrin (5):  $\Delta\epsilon = -17.2$  mdeg (*c* 0.33 mM, CH<sub>3</sub>OH,  $\lambda_{\max} = 216$  nm), tremulacin (6):  $\Delta\epsilon = -19.6$  and  $-8.8$  mdeg (*c* 0.38 mM, CH<sub>3</sub>OH,  $\lambda_{\max} = 228, 209$  nm).

## 8. Purification of fraction F7-4

For the semi-preparative UV-HPLC ( $\lambda = 200$  nm) fractionation of F7-4 (15 mg/mL in methanol) a semi-preparative 250 × 10 mm, 5  $\mu$ m, PFP column was used. The chromatographic separation was performed using 0.1 % formic acid in water (solvent A) and 0.1 % formic acid in methanol (solvent B). The injection volume for both fractions was 100  $\mu$ L. The run time of the chromatographic separation of fraction F7-4 was 56 min. Chromatography of F7-4 started at 40% B, held at 40% B for 3 min, increased to 53% B in 17 min, held for 2 min, increased further to 57% B in 26 min, held for 2 min, and finally decreased again to 40% B in 3 min, which was held isocratic for 3 min.  $\beta$ -D-Glucopyranoside, 2-[[[(1-hydroxy-6,6dihydroxy-2-cyclohexen-1-yl)dihydroxy]oxy]methyl]phenyl, 2-acetate (8) was structurally elucidated in fraction F7-4-6 using LC-ToF-MS and 1D/2D-NMR experiments.

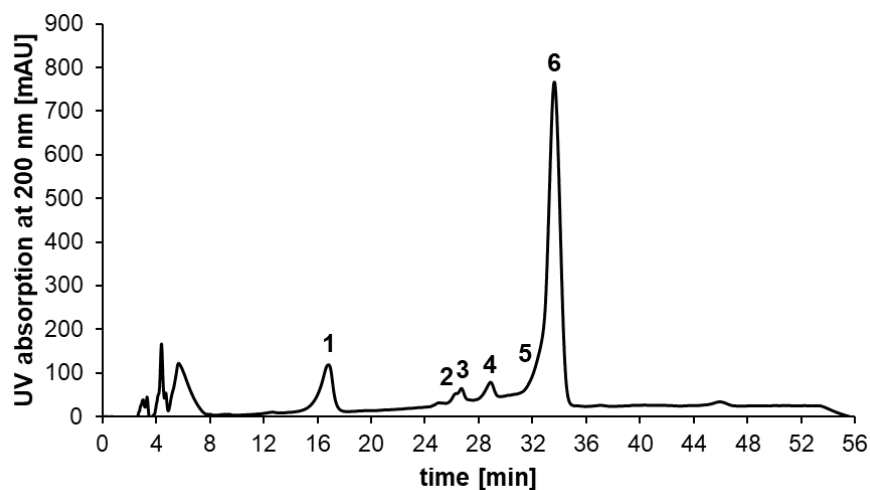

**Figure S17:** Semi-preparative UV-HPLC ( $\lambda = 200$  nm) chromatogram of fraction F7-4.

***$\beta$ -D-Glucopyranoside, 2-[[[(1-hydroxy-6,6-dihydroxy-2-cyclohexen-1-yl)dihydroxy]oxy]methyl]phenyl, 2-acetate (8) in F7-4-6***

$C_{22}H_{28}O_{12}$ ; LC-TOF-MS (ESI<sup>-</sup>):  $m/z$  465.1401 [M-H<sub>2</sub>O-H]<sup>-</sup>

After acetalization:

$C_{28}H_{36}O_{12}$ ; LC-TOF-MS (ESI<sup>-</sup>):  $m/z$  563.2126 [M+two acetal groups-H]<sup>-</sup>

## 9. NMR spectroscopic data

The spectroscopic data of the isolated compounds are shown in Table 1-6. For NMR analysis, compound **6** was dissolved in DMSO-*d*<sub>6</sub>, **1**, **2**, **4**, and **5** in acetone-*d*<sub>6</sub>, **6** in acetonitrile-*d*<sub>3</sub>, and **3** in methanol-*d*<sub>4</sub>.

**Table S1:** <sup>13</sup>C-NMR data of **1-6**. \*compound 5: C(8) = [C=O], \*\*compound 6: C(1'') = [C=O], C(2'') = [C].

| Position | HSQC               | $\delta_c$ [ppm] |        |        |        |         |          |
|----------|--------------------|------------------|--------|--------|--------|---------|----------|
|          |                    | 1                | 2      | 3      | 4      | 5       | 6        |
| 1        | [C]                | 155.88           | 156.41 | 155.85 | 155.78 | 155.85  | 154.20   |
| 2        | [C]                | 125.94           | 125.83 | 131.92 | 126.10 | 126.17  | 124.34   |
| 3        | [CH]               | 129.50           | 130.10 | 128.90 | 129.61 | 130.61  | 127.94   |
| 4        | [CH]               | 123.36           | 123.10 | 123.70 | 123.56 | 123.66  | 122.30   |
| 5        | [CH]               | 130.40           | 130.66 | 129.47 | 130.35 | 129.55  | 129.40   |
| 6        | [CH]               | 116.49           | 116.35 | 115.96 | 116.62 | 116.80  | 115.05   |
| 7        | [CH <sub>2</sub> ] | 63.08            | 63.67  | 59.97  | 63.07  | 62.17   | 61.40    |
| 8        | [C=O]              | 170.79           | 170.86 | -      | 170.78 | 170.78  | 169.86   |
| 9        | [C]                | 78.81            | 78.83  | -      | 78.85  | 78.86   | 77.35    |
| 10       | [CH]               | 129.30           | 129.29 | -      | 129.31 | 129.30  | 128.66   |
| 11       | [CH]               | 132.43           | 132.44 | -      | 132.41 | 132.43  | 131.56   |
| 12       | [CH <sub>2</sub> ] | 27.20            | 27.17  | -      | 27.20  | 27.20   | 25.85    |
| 13       | [CH <sub>2</sub> ] | 36.09            | 36.11  | -      | 36.06  | 36.07   | 35.56    |
| 14       | [C=O]              | 206.20           | 206.21 | -      | 206.20 | 206.18  | 205.92   |
| 1'       | [CH]               | 100.18           | 102.03 | 100.75 | 100.06 | 100.25  | 98.41    |
| 2'       | [CH]               | 74.39            | 72.87  | 75.07  | 74.26  | 74.41   | 73.79    |
| 3'       | [CH]               | 75.66            | 77.70  | 75.98  | 75.06  | 75.45   | 74.29    |
| 4'       | [CH]               | 71.44            | 69.36  | 71.41  | 71.47  | 71.39   | 69.89    |
| 5'       | [CH]               | 78.05            | 78.46  | 78.35  | 75.50  | 75.05   | 77.28    |
| 6'       | [CH <sub>2</sub> ] | 62.37            | 62.19  | 62.40  | 64.01  | 65.76   | 60.54    |
| 7'       | [C=O]              | -                | -      | -      | 170.92 | -       | -        |
| 8'       | [CH <sub>3</sub> ] | -                | -      | -      | 20.72  | 170.78* | -        |
| 9'       | [C]                | -                | -      | -      | -      | 78.82   | -        |
| 10'      | [CH]               | -                | -      | -      | -      | 129.26  | -        |
| 11'      | [CH]               | -                | -      | -      | -      | 132.35  | -        |
| 12'      | [CH <sub>2</sub> ] | -                | -      | -      | -      | 27.20   | -        |
| 13'      | [CH <sub>2</sub> ] | -                | -      | -      | -      | 36.07   | -        |
| 14'      | [C=O]              | -                | -      | -      | -      | 206.18  | -        |
| 1''      | [CH <sub>3</sub> ] | 21.02            | 21.11  | 21.02  | 21.00  | 21.01   | 165.10** |
| 2''      | [C=O]              | 170.30           | 170.79 | 170.55 | 170.27 | 170.26  | 129.74** |
| 3''      | [CH]               | -                | -      | -      | -      | -       | 129.34   |
| 4''      | [CH]               | -                | -      | -      | -      | -       | 128.68   |
| 5''      | [CH]               | -                | -      | -      | -      | -       | 133.38   |
| 6''      | [CH]               | -                | -      | -      | -      | -       | 128.68   |
| 7''      | [CH]               | -                | -      | -      | -      | -       | 129.34   |

**Table S2:** <sup>1</sup>H-NMR data of 1-6. \*compound 5: C(8) = [C=O], \*\* compound 6: C(1'') = [C=O], C(2'') = [C].

| Position | HSQC               | $\delta_H$ [ppm]       |                        |              |                        |                        |                        |
|----------|--------------------|------------------------|------------------------|--------------|------------------------|------------------------|------------------------|
|          |                    | 1                      | 2                      | 3            | 4                      | 5                      | 6                      |
| 1        | [C]                | -                      | -                      | -            | -                      | -                      | -                      |
| 2        | [C]                | -                      | -                      | -            | -                      | -                      | -                      |
| 3        | [CH]               | 7.31                   | 7.33                   | 7.38         | 7.33                   | 7.37                   | 7.13                   |
| 4        | [CH]               | 7.05                   | 7.05                   | 7.03         | 7.06                   | 7.08                   | 7.00                   |
| 5        | [CH]               | 7.28                   | 7.31                   | 7.21         | 7.31                   | 7.32                   | 7.29                   |
| 6        | [CH]               | 7.21                   | 7.25                   | 7.13         | 7.22                   | 7.22                   | 7.18                   |
| 7        | [CH <sub>2</sub> ] | 5.18                   | 5.23<br>5.35           | 4.55         | 5.13                   | 5.18<br>5.12           | 4.80<br>4.95           |
| 8        | [C=O]              | -                      | -                      | -            | -                      | -                      | -                      |
| 9        | [C]                | -                      | -                      | -            | -                      | -                      | -                      |
| 10       | [CH]               | 5.80                   | 5.78                   | -            | 5.80                   | 5.80                   | 5.66                   |
| 11       | [CH]               | 6.14                   | 6.13                   | -            | 6.14                   | 6.14                   | 6.07                   |
| 12       | [CH <sub>2</sub> ] | 2.49-2.54<br>2.67-2.76 | 2.48-2.53<br>2.64-2.71 | -            | 2.48-2.53<br>2.66-2.75 | 2.46-2.54<br>2.62-2.73 | 2.39-2.46<br>2.47-2.56 |
| 13       | [CH <sub>2</sub> ] | 2.59-2.66<br>2.94-2.86 | 2.54-2.57<br>2.83-2.90 | -            | 2.54-2.58<br>2.85-2.93 | 2.53-2.59<br>2.84-2.92 | 2.47-2.52<br>2.69-2.63 |
| 14       | [C=O]              | -                      | -                      | -            | -                      | -                      | -                      |
| 1'       | [CH]               | 5.13                   | 5.11                   | 5.05         | 5.16                   | 5.17                   | 5.29                   |
| 2'       | [CH]               | 5.02                   | 3.64                   | 5.03         | 5.06                   | 5.02                   | 5.05                   |
| 3'       | [CH]               | 3.72                   | 5.08                   | 3.66         | 3.82                   | 3.74                   | 3.69                   |
| 4'       | [CH]               | 3.57                   | 3.66                   | 3.50         | 3.58                   | 3.52                   | 3.34                   |
| 5'       | [CH]               | 3.58                   | 3.63                   | 3.51         | 3.77                   | 3.85                   | 3.51                   |
| 6'       | [CH <sub>2</sub> ] | 3.73<br>3.91           | 3.74<br>3.89           | 3.71<br>3.91 | 3.74<br>3.91           | 4.27<br>4.64           | 3.55<br>3.76           |
| 7'       | [C=O]              | -                      | -                      | -            | -                      | -                      | -                      |
| 8'       | [CH <sub>3</sub> ] | -                      | -                      | -            | 2.03                   | _*                     | -                      |
| 9'       | [C]                | -                      | -                      | -            | -                      | -                      | -                      |
| 10'      | [CH]               | -                      | -                      | -            | -                      | 5.75                   | -                      |
| 11'      | [CH]               | -                      | -                      | -            | -                      | 6.08                   | -                      |
| 12'      | [CH <sub>2</sub> ] | -                      | -                      | -            | -                      | 2.46-2.54<br>2.62-2.73 | -                      |
| 13'      | [CH <sub>2</sub> ] | -                      | -                      | -            | -                      | 2.53-2.59<br>2.84-2.92 | -                      |
| 14'      | [C=O]              | -                      | -                      | -            | -                      | -                      | -                      |
| 1''      | [CH <sub>3</sub> ] | 2.07                   | 2.05                   | 2.12         | 2.10                   | 2.08                   | _**                    |
| 2''      | [C=O]              | -                      | -                      | -            | -                      | -                      | _**                    |
| 3''      | [CH]               | -                      | -                      | -            | -                      | -                      | 7.98                   |
| 4''      | [CH]               | -                      | -                      | -            | -                      | -                      | 7.52                   |
| 5''      | [CH]               | -                      | -                      | -            | -                      | -                      | 7.65                   |
| 6''      | [CH]               | -                      | -                      | -            | -                      | -                      | 7.52                   |
| 7''      | [CH]               | -                      | -                      | -            | -                      | -                      | 7.98                   |

**Table S3:** Multiplicity and coupling constants of **1-6**. \*compound 5: C(8) = [C=O], \*\* compound 6: C(1'') = [C=O], C(2'') = [C].

| Position | HSQC               | Multiplicity; J [Hz] |                                    |                           |                                    |                                    |                            |
|----------|--------------------|----------------------|------------------------------------|---------------------------|------------------------------------|------------------------------------|----------------------------|
|          |                    | 1                    | 2                                  | 3                         | 4                                  | 5                                  | 6                          |
| 1        | [C]                | -                    | -                                  | -                         | -                                  | -                                  | -                          |
| 2        | [C]                | -                    | -                                  | -                         | -                                  | -                                  | -                          |
| 3        | [CH]               | m                    | m                                  | m                         | m                                  | m                                  | dd; 7.70, 1.51             |
| 4        | [CH]               | td; 7.50, 1.08       | td; 7.50, 1.15                     | m                         | td; 7.44, 1.12                     | td; 7.42, 1.00                     | td; 7.62, 1.00             |
| 5        | [CH]               | m                    | m                                  | m                         | m                                  | dd; 7.78, 1.73                     | ddd; 7.97, 1.52            |
| 6        | [CH]               | d; 8.00              | d; 7.84                            | dd; 8.20, 1.05            | dd; 8.78, 1.06                     | d; 8.19                            | d; 8.21                    |
| 7        | [CH <sub>2</sub> ] | d; 2.73 (overlap)    | d; 12.80<br>d; 12.80               | q; 15.46, 13.60 (overlap) | d; 13.07 (overlap)                 | d; 12.87 (overlap)<br>d; 12.87     | d; 13.37<br>d; 13.37       |
| 8        | [C=O]              | -                    | -                                  | -                         | -                                  | -                                  | -                          |
| 9        | [C]                | -                    | -                                  | -                         | -                                  | -                                  | -                          |
| 10       | [CH]               | dt; 9.70, 1.70       | dt; 9.70, 1.70                     | -                         | dt; 9.81, 3.48                     | dt; 9.80, 1.70                     | dt; 9.90, 1.57             |
| 11       | [CH]               | dt; 9.70, 3.80       | dt; 9.70, 3.80                     | -                         | dt; 9.67, 3.71                     | dt; 9.81, 3.96                     | dt; 9.81, 3.74             |
| 12       | [CH <sub>2</sub> ] | m<br>m               | m<br>m                             | -                         | m<br>m                             | m<br>m                             | m<br>m (overlap)           |
| 13       | [CH <sub>2</sub> ] | m<br>m               | m<br>m                             | -                         | m<br>m                             | m<br>m                             | m (overlap)<br>m (overlap) |
| 14       | [C=O]              | -                    | -                                  | -                         | -                                  | -                                  | -                          |
| 1'       | [CH]               | d; 7.16              | d; 7.70                            | d; 8.05                   | d; 7.16                            | d; 8.19                            | d; 8.13                    |
| 2'       | [CH]               | dd; 8.08, 1.62       | m                                  | dd; 8.01, 1.46            | dd; 8.33, 1.58                     | dd; 8.10, 1.55                     | dd; 8.08, 1.62             |
| 3'       | [CH]               | m                    | d; 9.30                            | m                         | m                                  | t; 9.45                            | td; 5.49, 3.74             |
| 4'       | [CH]               | m                    | m                                  | m                         | t; 9.31                            | t; 9.45                            | s                          |
| 5'       | [CH]               | m                    | m                                  | m                         | t; 9.44                            | ddd; 6.90, 5.12, 2.04              | m                          |
| 6'       | [CH <sub>2</sub> ] | m                    | dd; 11.35, 3.69<br>dd; 11.39, 2.99 | m                         | dd; 11.75, 2.30<br>dd; 11.95, 6.24 | dd; 11.80, 6.79<br>dd; 11.82, 2.06 | m<br>dd; 10.68, 4.99       |
| 7'       | [C=O]              | -                    | -                                  | -                         | -                                  | -                                  | -                          |
| *8'      | [CH <sub>2</sub> ] | -                    | -                                  | -                         | s                                  | -                                  | -                          |
| 9'       | [C]                | -                    | -                                  | -                         | -                                  | -                                  | -                          |
| 10'      | [CH]               | -                    | -                                  | -                         | -                                  | dt; 9.80, 1.79                     | -                          |
| 11'      | [CH]               | -                    | -                                  | -                         | -                                  | dt; 9.93, 3.89                     | -                          |
| 12'      | [CH <sub>2</sub> ] | -                    | -                                  | -                         | -                                  | m<br>m<br>m                        | -                          |
| 13'      | [CH <sub>2</sub> ] | -                    | -                                  | -                         | -                                  | m                                  | -                          |
| 14'      | [C=O]              | -                    | -                                  | -                         | -                                  | -                                  | -                          |
| **1''    | [CH <sub>2</sub> ] | s                    | s                                  | s                         | s                                  | s                                  | -                          |
| **2''    | [C=O]              | -                    | -                                  | -                         | -                                  | -                                  | -                          |
| 3''      | [CH]               | -                    | -                                  | -                         | -                                  | -                                  | t; 7.94                    |
| 4''      | [CH]               | -                    | -                                  | -                         | -                                  | -                                  | m                          |
| 5''      | [CH]               | -                    | -                                  | -                         | -                                  | -                                  | m                          |
| 6''      | [CH]               | -                    | -                                  | -                         | -                                  | -                                  | t; 7.94                    |
| 7''      | [CH]               | -                    | -                                  | -                         | -                                  | -                                  | m                          |

**Table S4:** NMR data (500/125 MHz) of **7**.

| Position | HSQC               | $\delta_c$ [ppm] | $\delta_H$ [ppm] | Multiplicity; $J$ [Hz]                           |
|----------|--------------------|------------------|------------------|--------------------------------------------------|
| 1        | [CH <sub>2</sub> ] | 70.11            | 4.24<br>4.43     | ddd; 12.83, 6.54, 1.44<br>ddd; 12.80, 7.04, 1.52 |
| 2        | [CH]               | 126.84           | 6.35             | ddd; 16.14, 5.61                                 |
| 3        | [CH]               | 133.01           | 6.69             | dt; 15.89, 1.82                                  |
| 4        | [C]                | 137.80           | -                | -                                                |
| 5        | [CH]               | 127.41           | 7.44             | d; 7.60                                          |
| 6        | [CH]               | 129.67           | 7.35             | m                                                |
| 7        | [CH]               | 128.73           | 7.30             | m                                                |
| 8        | [CH]               | 129.67           | 7.35             | m                                                |
| 9        | [CH]               | 127.41           | 7.44             | d; 7.60                                          |
| 1'       | [CH]               | 102.85           | 4.31             | d; 7.75                                          |
| 2'       | [CH]               | 74.70            | 3.14             | t; 8.10, 8.59                                    |
| 3'       | [CH]               | 71.25            | 3.22             | m                                                |
| 4'       | [CH]               | 77.63            | 3.37             | m                                                |
| 5'       | [CH]               | 73.75            | 3.25             | m                                                |
| 6'       | [CH <sub>2</sub> ] | 67.90            | 3.64<br>3.88     | m<br>dd; 11.46, 1.92                             |
| 1''      | [CH]               | 101.66           | 4.72             | dd; 16.35, 1.03                                  |
| 2''      | [CH]               | 71.74            | 3.78             | dd; 3.78, 1.53                                   |
| 3''      | [CH]               | 72.26            | 3.54             | dd; 9.45, 3.63                                   |
| 4''      | [CH]               | 76.34            | 3.29             | m                                                |
| 5''      | [CH]               | 69.07            | 3.59             | m                                                |
| 6''      | [CH <sub>3</sub> ] | 18.10            | 1.21             | d; 6.41                                          |



**Table S5:** NMR data (500/125 MHz) of first diastereomer **8** (compound B) in methanol-*d*<sub>4</sub>.

| Position | HSQC               | $\delta_c$ [ppm] | $\delta_H$ [ppm] | Multiplicity; <i>J</i> [Hz] |
|----------|--------------------|------------------|------------------|-----------------------------|
| 1        | [C]                | 156.06           | -                | -                           |
| 2        | [C]                | 126.72           | -                | -                           |
| 3        | [CH]               | 129.67           | 7.39             | m                           |
| 4        | [CH]               | 123.82           | 7.04             | dt; 7.07, 1.14              |
| 5        | [CH]               | 130.39           | 7.30             | m                           |
| 6        | [CH]               | 116.85           | 7.21             | ddd; 1.23, 7.57             |
| 7        | [CH <sub>2</sub> ] | 63.13            | 5.11-5.18        | m                           |
| 8        | [C=O]              | 171.58           | -                | -                           |
| 9        | [C]                | 86.75            | -                | -                           |
| 10       | [CH]               | 127.19           | 5.59             | dd; 10.10, 2.75             |
| 11       | [CH]               | 131.12           | 6.02             | m                           |
| 12       | [CH <sub>2</sub> ] | 23.31            | 1.98-2.06        | m                           |
| 13       | [CH <sub>2</sub> ] | 33.19            | 2.17-2.24        | m                           |
|          |                    |                  | 1.93-2.00        | m                           |
|          |                    |                  | 2.41-2.53        | m                           |
| 14       | [C]                | 104.47           | -                | -                           |
| 1'       | [CH]               | 100.74           | 5.09             | m                           |
| 2'       | [CH]               | 75.00            | 5.03             | m                           |
| 3'       | [CH]               | 75.98            | 3.64-3.67        | m                           |
| 4'       | [CH]               | 71.42            | 3.49             | m                           |
| 5'       | [CH]               | 78.38            | 3.50             | m                           |
| 6'       | [CH <sub>2</sub> ] | 62.41            | 3.75             | m                           |
| 1''      | [CH <sub>3</sub> ] | 21.10            | 3.94             | m                           |
|          |                    |                  | 2.15             | s                           |
| 2''      | [C=O]              | 171.98           | -                | -                           |

**Table S6:** NMR data (500/125 MHz) of second diastereomer **8** (compound C) in methanol-*d*<sub>4</sub>.

| Position | HSQC               | $\delta_C$ [ppm] | $\delta_H$ [ppm] | Multiplicity; <i>J</i> [Hz] |
|----------|--------------------|------------------|------------------|-----------------------------|
| 1        | [C]                | 156.06           | -                | -                           |
| 2        | [C]                | 126.72           | -                | -                           |
| 3        | [CH]               | 129.67           | 7.39             | m                           |
| 4        | [CH]               | 123.82           | 7.04             | dt; 7.07, 1.14              |
| 5        | [CH]               | 130.39           | 7.30             | m                           |
| 6        | [CH]               | 116.85           | 7.21             | ddd; 1.23, 7.57             |
| 7        | [CH <sub>2</sub> ] | 63.13            | 5.11-5.18        | m                           |
| 8        | [C=O]              | 173.02           | -                | -                           |
| 9        | [C]                | 77.33            | -                | -                           |
| 10       | [CH]               | 128.44           | 5.53             | dt (10.03, 2.01)            |
| 11       | [CH]               | 132.80           | 5.98             | dt (9.98, 3.62)             |
| 12       | [CH <sub>2</sub> ] | 25.29            | 2.19-2.26        | m                           |
|          |                    |                  | 2.33-3.39        | m                           |
| 13       | [CH <sub>2</sub> ] | 32.13            | 2.44-2.51        | m                           |
| 14       | [C]                | 111.81           | -                | -                           |
| 1'       | [CH]               | 100.74           | 5.09             | m                           |
| 2'       | [CH]               | 75.00            | 5.03             | m                           |
| 3'       | [CH]               | 75.98            | 3.64-3.67        | m                           |
| 4'       | [CH]               | 71.42            | 3.49             | m                           |
| 5'       | [CH]               | 78.38            | 3.50             | m                           |
| 6'       | [CH <sub>2</sub> ] | 62.41            | 3.75             | m                           |
|          |                    |                  | 3.94             | m                           |
| 1''      | [CH <sub>3</sub> ] | 21.10            | 2.15             | s                           |
| 2''      | [C=O]              | 171.98           | -                | -                           |
